# Supplementary material for: Role of Br–Cl distribution uniformity on the spectral stability of blue emitting mixed-halide perovskites
Source: Royal Society of Chemistry journal article supplement (doi:10.1039/d4tc03780d), 2024-11-05
Supplement: d4tc03780d1.pdf [file d4tc03780d1.pdf]

# Supplementary Material

## **Role of Br-Cl distribution uniformity on the spectral stability of blue emitting mixed-halide perovskites**

Dan Chen, Yu Mao, Xianglan Huang, Jichen Zhao, Zhiyuan Zhang, Jian Wang\* and

Junbiao Peng

Institute of Polymer Optoelectronic Materials and Devices, State Key Laboratory of Luminescent Materials and Devices, South China University of Technology, Guangzhou 510640, China. E-mail: [jianwang@scut.edu.cn](mailto:jianwang@scut.edu.cn)

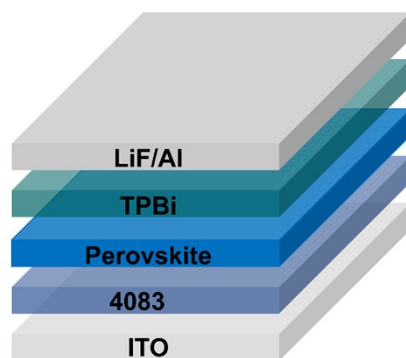

**Figure S1. Schematic illustration of the device configuration.**

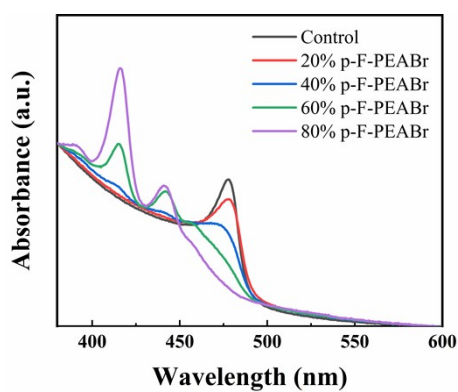

**Figure S2. UV-vis absorption spectrum of CsPbClBr<sub>2</sub> doped with different concentrations of p-F-PEABr.**

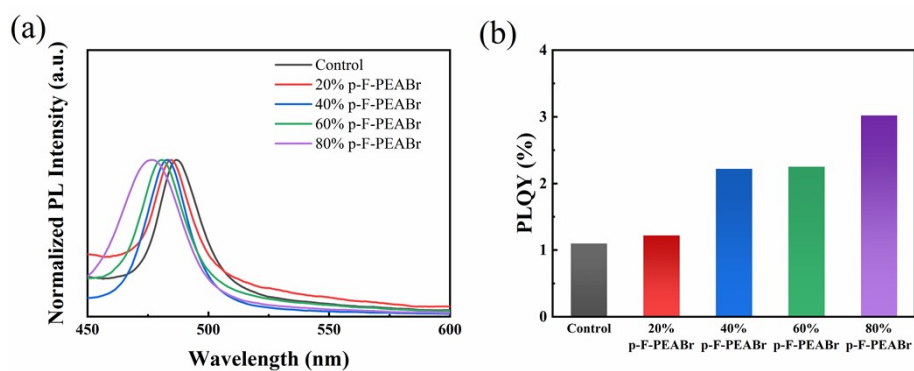

**Figure S3. (a) PL spectra, and (b) PLQY of CsPbClBr<sub>2</sub> doped with different concentrations of p-F-PEABr.**

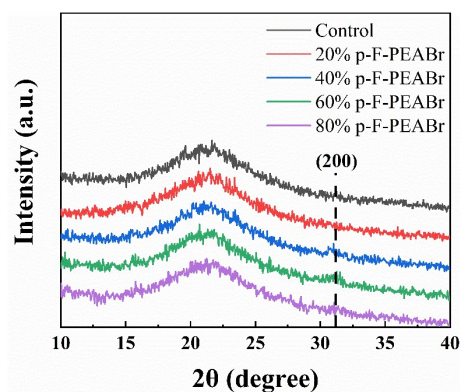

**Figure S4. XRD patterns of CsPbClBr<sub>2</sub> doped with different concentrations of p-F-PEABr.**

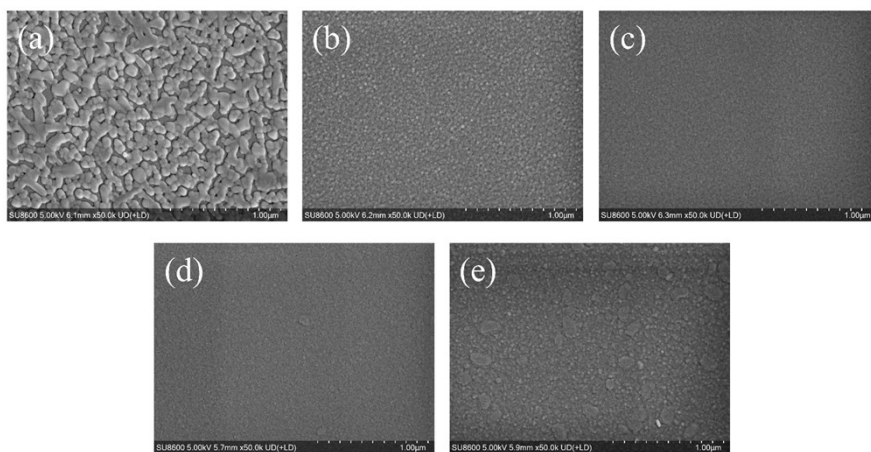

**Figure S5. SEM images of CsPbClBr<sub>2</sub> doped with different concentrations of p-F-PEABr: (a) Control, (b) 20 %, (c) 40 %, (d) 60 %, (e) 80 %.**

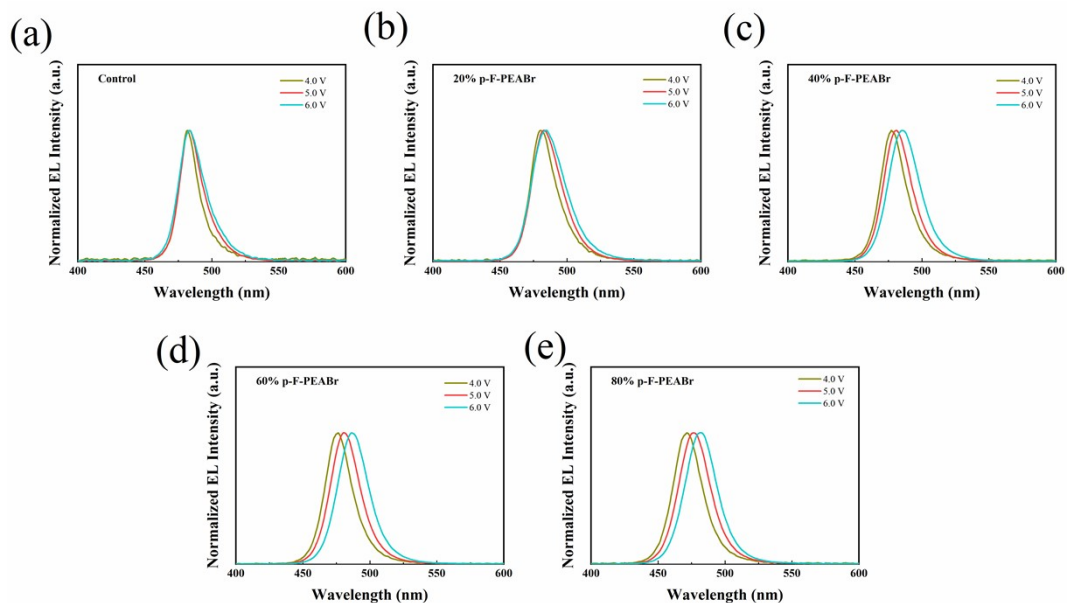

**Figure S6. The EL spectrum of the representative PeLEDs:** (a) Control, (b) 20% p-F-PEABr, (c) 40% p-F-PEABr, (d) 60% p-F-PEABr, (e) 80% p-F-PEABr.

**Table S1. EL peak shift of CsPbClBr<sub>2</sub> doped with different concentrations of p-F-PEABr.**

| p-F-PEABr (%) | EL peak at 4V (nm) | EL peak at 6V (nm) | Red shift of EL peak (nm) |
|---------------|--------------------|--------------------|---------------------------|
| 0             | 481.8              | 483.3              | 1.5                       |
| 20            | 480.3              | 484.3              | 4.0                       |
| 40            | 477.1              | 485.0              | 7.9                       |
| 60            | 476.3              | 486.6              | 10.3                      |
| 80            | 471.6              | 481.9              | 10.3                      |

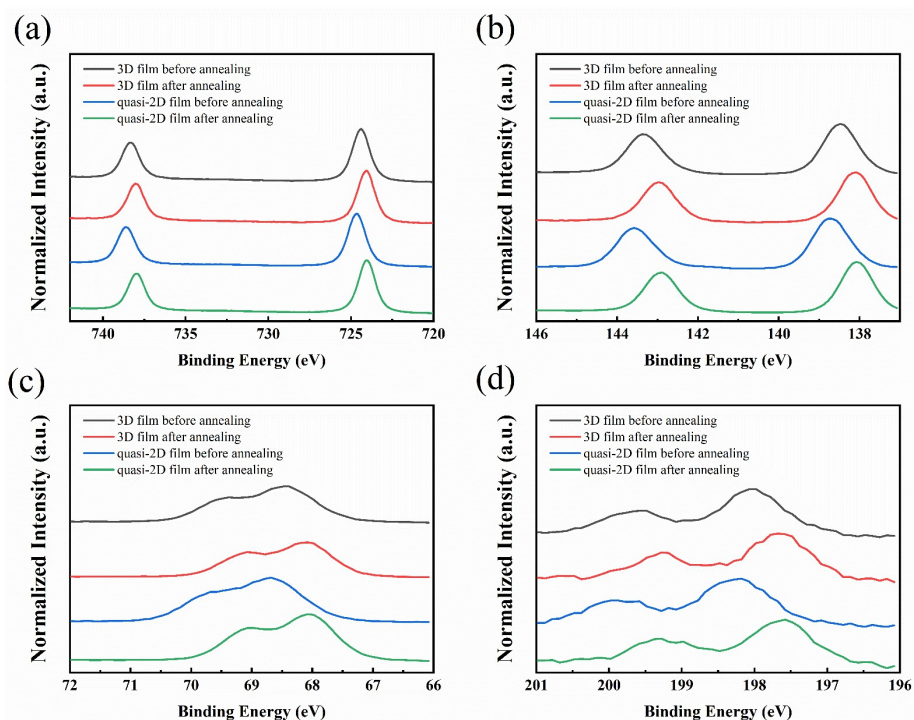

**Figure S7. XPS spectra of 3D and quasi-2D films before and after annealing: (a) Cs 3d, (b) Pb 4f, (c) Br 3d, (d) Cl 2p.**

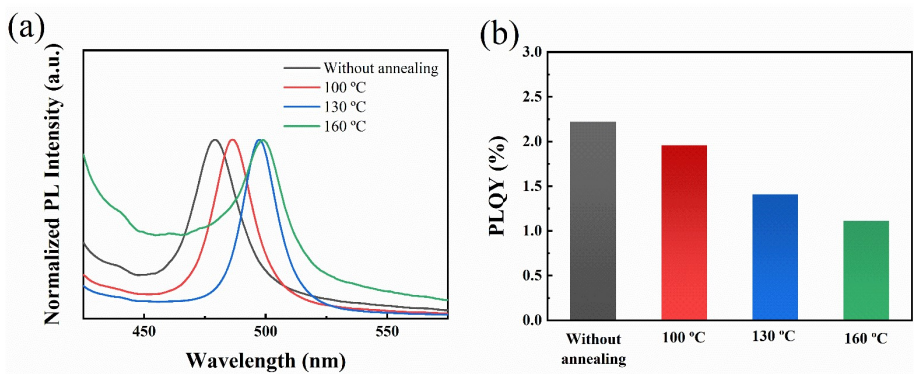

**Figure S8. (a) PL spectra, and (b) PLQY of 40% p-F-PEABr doped CsPbClBr<sub>2</sub> film after annealing at different annealing temperatures.**

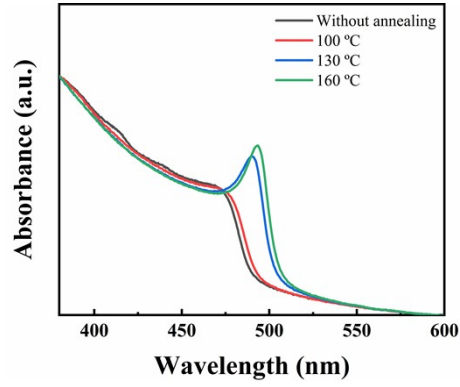

**Figure S9. UV-vis spectra of 40% p-F-PEABr doped CsPbClBr<sub>2</sub> film after annealing at different annealing temperatures.**

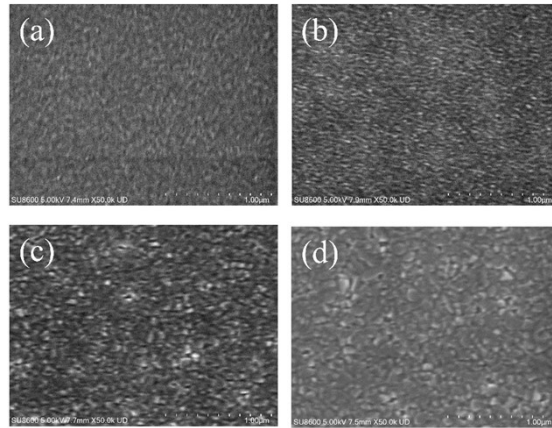

**Figure S10. SEM images of 40% p-F-PEABr doped CsPbClBr<sub>2</sub> film after annealing at different annealing temperatures: (a) without annealing, (b) 100 °C, (c) 130 °C, (d) 160 °C.**

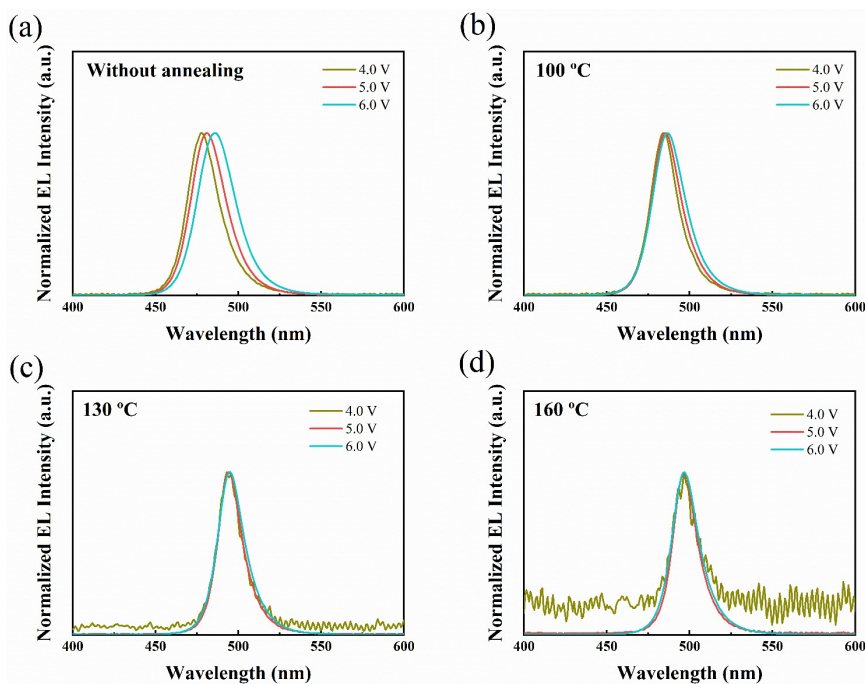

**Figure S11. The EL spectrum of the representative PeLEDs at different annealing temperatures: (a) without annealing, (b) 100 °C, (c) 130 °C, (d) 160 °C.**

**Table S2. EL peak shifts of 40% p-F-PEABr doped CsPbClBr<sub>2</sub> PeLEDs at different annealing temperatures.**

| Annealing temperatures (°C) | EL peak at 4 V (nm) | EL peak at 6 V (nm) | Red shift of EL peak (nm) |
|-----------------------------|---------------------|---------------------|---------------------------|
| Without annealing           | 477.1               | 485.0               | 7.9                       |
| 100                         | 484.3               | 486.9               | 2.6                       |
| 130                         | 493.0               | 494.0               | 1.0                       |
| 160                         | 496.1               | 496.3               | 0.2                       |

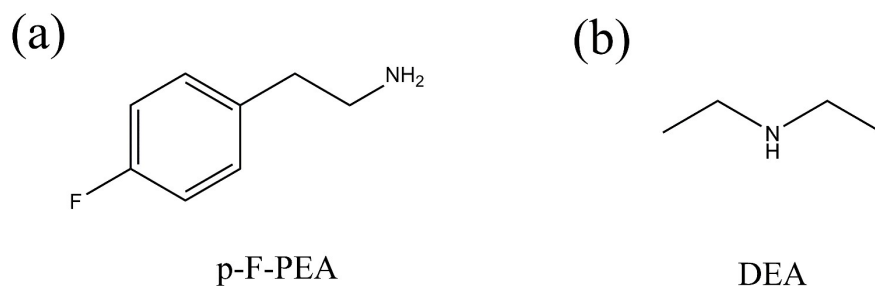

**Figure S12. Molecular structures of p-F-PEA and DEA.**

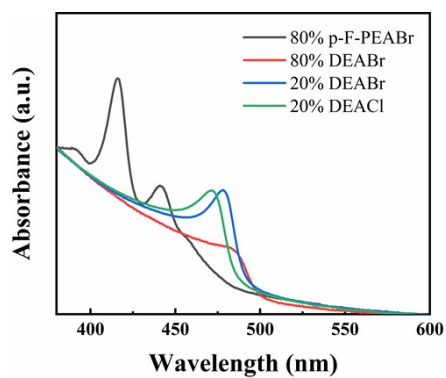

**Figure S13. UV-vis spectra of CsPbClBr<sub>2</sub> films doped by different dopants.**

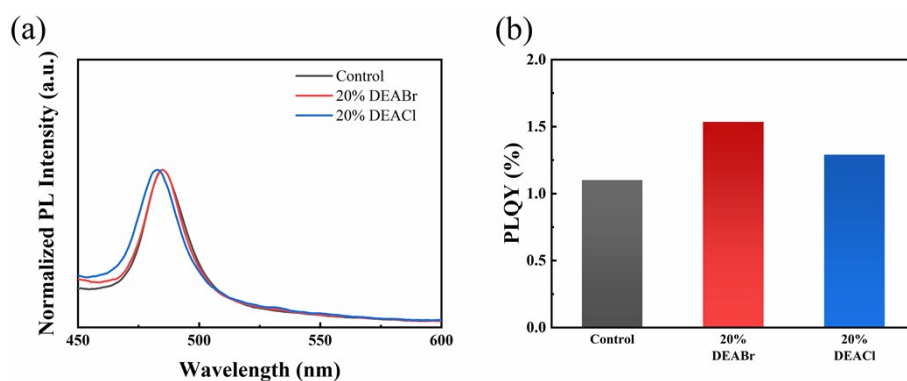

**Figure S14. (a) PL spectra, and (b) PLQY of 20% DEABr, and 20% DEACl doped CsPbClBr<sub>2</sub> films.**



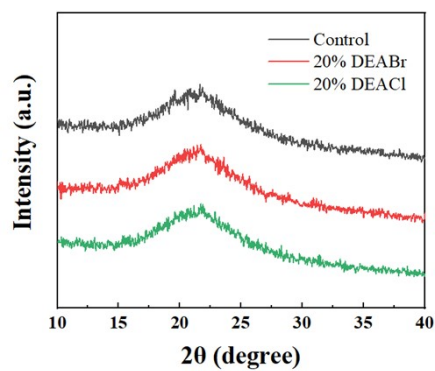

**Figure S15. XRD patterns of 20% DEABr, and 20% DEACl doped CsPbClBr<sub>2</sub> films.**

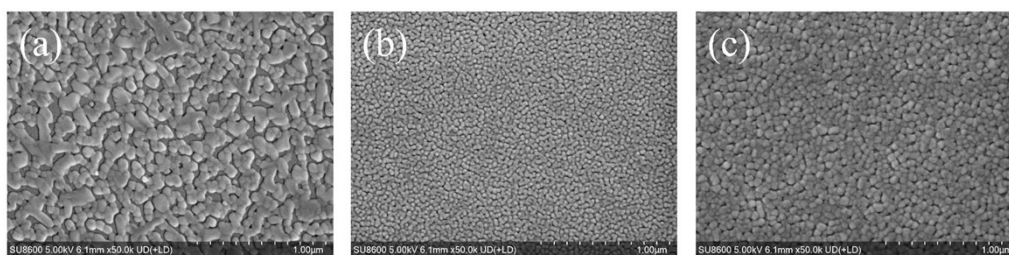

**Figure S16. SEM images of 20% DEABr, and 20% DEACl doped CsPbClBr<sub>2</sub> films: (a) Control, (b) 20% DEABr, (c) 20% DEACl.**

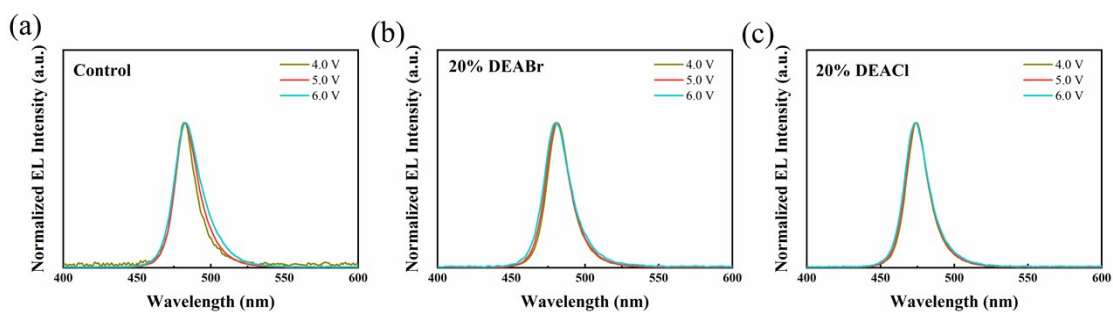

**Figure S17. The EL spectra of the representative PeLEDs: (a) Control, (b) 20% DEABr, (c) 20% DEACl.**

**Table S3. EL peak shifts of 20% DEABr, and 20% DEACl doped CsPbClBr<sub>2</sub> PeLEDs.**

| Emitter   | EL peak at 4V (nm) | EL peak at 6V (nm) | Red shift of EL peak (nm) |
|-----------|--------------------|--------------------|---------------------------|
| Control   | 481.8              | 483.3              | 1.5                       |
| 20% DEABr | 481.9              | 482.2              | 0.3                       |
| 20% DEACl | 474.0              | 473.6              | -0.4                      |
